# Supplementary material
Source: Springer Nature journal article supplement (https://www.springermedizin.de/resource/supplementary/12893_2012_434_MOESM3_ESM.pdf/9512108)

# Identity check prior surgery

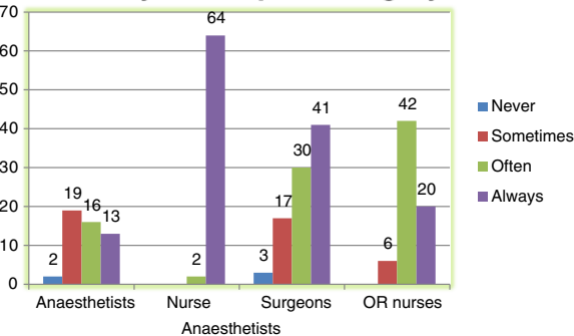

Supplement: MOESM3 [file 9512108]
